# Supplementary material
Source: PubMed Central journal article supplement (PMC9749489)
Supplement: NIHMS1847843-supplement-3.pdf [file NIHMS1847843-supplement-3.pdf]

## ■ ASSOCIATED CONTENT

### SI Supporting Information

The Supporting Information is available free of charge at <https://pubs.acs.org/doi/10.1021/acs.biochem.0c00294>.

Mass spectra, additional DEER data, raw data analysis details, CW EPR spectra, and MD simulations ([PDF](#))

Movie 1 ([MPG](#))
